# Supplementary material
Source: PubMed Central journal article supplement (PMC169939)
Supplement: nar_31_16_4864__1.pdf [file nar_31_16_4864__1.pdf]

**Supplementary Table A. Complete list of genes on *T. brucei* ChrI**

| <b>Gene</b> | <b>5'-coord</b> | <b>3'-coord</b> | <b>Description</b>                         | <b>gene symbol</b> |
|-------------|-----------------|-----------------|--------------------------------------------|--------------------|
| Tb927.1.05  | 1961            | 384             | variant surface glycoprotein, putative     |                    |
| Tb927.1.10  | 6871            | 7203            | hypothetical protein                       |                    |
| Tb927.1.20  | 8555            | 7554            | ESAG3, pseudogene                          |                    |
| Tb927.1.30  | 11158           | 11865           | hypothetical protein                       |                    |
| Tb927.1.40  | 12733           | 12407           | hypothetical protein                       |                    |
| Tb927.1.50  | 41283           | 41026           | hypothetical protein, unlikely             |                    |
| Tb927.1.60  | 43909           | 41927           | RNA polymerase, pseudogene                 |                    |
| Tb927.1.70  | 46994           | 44937           | Retrotransposon hot spot protein, RHS4i    |                    |
| Tb927.1.80  | 50099           | 49869           | hypothetical protein, unlikely             |                    |
| Tb927.1.90  | 52205           | 50428           | RHS, pseudogene                            |                    |
| Tb927.1.100 | 59283           | 57401           | RNA polymerase, pseudogene                 |                    |
| Tb927.1.110 | 59858           | 60184           | hypothetical protein, unlikely             |                    |
| Tb927.1.120 | 62836           | 60266           | Retrotransposon hot spot protein, RHS4I    |                    |
| Tb927.1.130 | 66354           | 66151           | hypothetical protein                       |                    |
| Tb927.1.140 | 66621           | 66499           | hypothetical protein                       |                    |
| Tb927.1.150 | 67200           | 67081           | hypothetical protein                       |                    |
| Tb927.1.160 | 67930           | 67643           | hypothetical protein                       |                    |
| Tb927.1.170 | 68221           | 67988           | hypothetical protein                       |                    |
| Tb927.1.180 | 72405           | 69904           | Retrotransposon hot spot protein, RHS1c    |                    |
| Tb927.1.190 | 77915           | 75424           | RHS, pseudogene                            |                    |
| Tb927.1.200 | 80183           | 80518           | hypothetical protein, unlikely             |                    |
| Tb927.1.210 | 83454           | 83858           | hypothetical protein, unlikely             |                    |
| Tb927.1.220 | 88355           | 85854           | Retrotransposon hot spot protein, RHS1b    |                    |
| Tb927.1.230 | 90305           | 90700           | hypothetical protein, unlikely             |                    |
| Tb927.1.240 | 99081           | 91365           | RHS, pseudogene                            |                    |
| Tb927.1.250 | 103589          | 103266          | hypothetical protein, unlikely             |                    |
| Tb927.1.260 | 106573          | 106271          | hypothetical protein, unlikely             |                    |
| Tb927.1.270 | 106654          | 107025          | hypothetical protein                       |                    |
| Tb927.1.275 | 108058          | 110934          | ESAG4, pseudogene                          |                    |
| Tb927.1.280 | 112381          | 112743          | hypothetical protein                       |                    |
| Tb927.1.290 | 112972          | 117318          | hypothetical leucine-rich repeat protein 1 |                    |
| Tb927.1.300 | 122050          | 128711          | RHS, pseudogene                            |                    |
| Tb927.1.310 | 129884          | 129633          | hypothetical protein, unlikely             |                    |
| Tb927.1.320 | 130249          | 131017          | RHS, pseudogene                            |                    |
| Tb927.1.330 | 131944          | 131092          | RHS1, pseudogene                           |                    |
| Tb927.1.340 | 132309          | 132683          | hypothetical protein, unlikely             |                    |
| Tb927.1.350 | 135438          | 133484          | RHS, pseudogene                            |                    |
| Tb927.1.360 | 136397          | 136080          | hypothetical protein, unlikely             |                    |
| Tb927.1.370 | 144560          | 140214          | hypothetical leucine-rich repeat protein 1 |                    |
| Tb927.1.380 | 145151          | 144726          | hypothetical protein                       |                    |
| Tb927.1.390 | 147175          | 147459          | hypothetical protein                       |                    |
| Tb927.1.400 | 147842          | 148204          | hypothetical protein                       |                    |
| Tb927.1.410 | 151277          | 153022          | RHS3c, pseudogene                          |                    |
| Tb927.1.420 | 156384          | 158411          | Retrotransposon hot spot protein, RHS5a    |                    |
| Tb927.1.430 | 159343          | 166610          | RHS2e, pseudogene                          |                    |
| Tb927.1.440 | 160434          | 165362          | Ing1 (orf1), pseudogene                    |                    |
| Tb927.1.450 | 174089          | 167799          | RHS, pseudogene                            |                    |
| Tb927.1.460 | 176376          | 176720          | hypothetical protein, unlikely             |                    |
| Tb927.1.470 | 181089          | 181451          | hypothetical protein                       |                    |
| Tb927.1.480 | 181680          | 186029          | hypothetical leucine-rich repeat protein 1 |                    |
| Tb927.1.490 | 189837          | 190085          | hypothetical protein                       |                    |

|              |        |        |                                            |      |
|--------------|--------|--------|--------------------------------------------|------|
| Tb927.1.510  | 190759 | 196430 | RHS, pseudogene                            |      |
| Tb927.1.520  | 197204 | 198051 | VSG, pseudogene                            |      |
| Tb927.1.530  | 204017 | 203196 | hypothetical protein                       |      |
| Tb927.1.540  | 207807 | 204418 | DNA-directed RNA polymerase III, putative  |      |
| Tb927.1.550  | 208479 | 208177 | hypothetical protein, unlikely             |      |
| Tb927.1.560  | 210031 | 208703 | conserved hypothetical protein             |      |
| Tb927.1.570  | 211419 | 210592 | conserved hypothetical protein             |      |
| Tb927.1.580  | 214005 | 212455 | phosphate-repressible phosphate permease,  |      |
| Tb927.1.590  | 216042 | 215626 | hypothetical protein                       |      |
| Tb927.1.600  | 217711 | 216164 | phosphate-repressible phosphate permease,  |      |
| Tb927.1.610  | 218989 | 218081 | hypothetical protein                       |      |
| Tb927.1.620  | 219492 | 219175 | hypothetical protein                       |      |
| Tb927.1.630  | 220083 | 219568 | anti-silencing protein ASF 1 like protein, |      |
| Tb927.1.640  | 225673 | 220727 | conserved hypothetical protein             |      |
| Tb927.1.650  | 226620 | 226021 | hypothetical protein                       |      |
| Tb927.1.660  | 227586 | 227413 | hypothetical protein                       |      |
| Tb927.1.670  | 229887 | 228043 | conserved hypothetical protein             |      |
| Tb927.1.680  | 230632 | 230291 | hypothetical protein, unlikely             |      |
| Tb927.1.690  | 231425 | 230694 | hypothetical protein                       |      |
| Tb927.1.700  | 233826 | 232504 | phosphoglycerate kinase                    | PGKC |
| Tb927.1.710  | 235438 | 234176 | phosphoglycerate kinase                    | PGKB |
| Tb927.1.720  | 237299 | 235770 | phosphoglycerate kinase                    | PGKA |
| Tb927.1.730  | 239543 | 237834 | hypothetical protein                       |      |
| Tb927.1.740  | 241685 | 240378 | hypothetical protein                       |      |
| Tb927.1.750  | 245925 | 242278 | hypothetical protein                       |      |
| Tb927.1.760  | 248931 | 246646 | hypothetical protein                       |      |
| Tb927.1.770  | 249253 | 248981 | hypothetical protein, unlikely             |      |
| Tb927.1.780  | 250595 | 249453 | hypothetical protein                       |      |
| Tb927.1.790  | 253387 | 250982 | hypothetical protein                       |      |
| Tb927.1.800  | 254093 | 253806 | hypothetical protein, unlikely             |      |
| Tb927.1.810  | 254655 | 254257 | hypothetical protein                       |      |
| Tb927.1.820  | 256136 | 254856 | hypothetical protein                       |      |
| Tb927.1.830  | 259748 | 256902 | hypothetical protein                       |      |
| Tb927.1.840  | 260743 | 260024 | hypothetical protein                       |      |
| Tb927.1.850  | 261035 | 260760 | hypothetical protein, unlikely             |      |
| Tb927.1.860  | 262067 | 261261 | hypothetical protein                       |      |
| Tb927.1.870  | 263580 | 262552 | deoxyhypusine synthase, putative           |      |
| Tb927.1.880  | 278186 | 264384 | conserved hypothetical protein             |      |
| Tb927.1.890  | 279201 | 278431 | hypothetical protein                       |      |
| Tb927.1.900  | 281577 | 281269 | hypothetical protein                       |      |
| Tb927.1.910  | 283206 | 283009 | hypothetical protein                       |      |
| Tb927.1.920  | 284545 | 284354 | hypothetical protein                       |      |
| Tb927.1.930  | 285471 | 285130 | hypothetical protein                       |      |
| Tb927.1.940  | 286328 | 285792 | hypothetical protein                       |      |
| Tb927.1.950  | 286565 | 286344 | hypothetical protein, unlikely             |      |
| Tb927.1.960  | 287102 | 286791 | hypothetical protein                       |      |
| Tb927.1.970  | 287728 | 287417 | hypothetical protein                       |      |
| Tb927.1.980  | 288091 | 287978 | hypothetical protein                       |      |
| Tb927.1.990  | 288582 | 289706 | hypothetical protein                       |      |
| Tb927.1.1000 | 289893 | 291155 | developmentally regulated phosphoprotein   |      |
| Tb927.1.1010 | 291585 | 293744 | hypothetical protein                       |      |
| Tb927.1.1020 | 294228 | 295508 | hypothetical protein                       |      |
| Tb927.1.1030 | 296968 | 298341 | hypothetical protein                       |      |

|              |        |        |                                                                                 |
|--------------|--------|--------|---------------------------------------------------------------------------------|
| Tb927.1.1040 | 298771 | 299280 | hypothetical protein                                                            |
| Tb927.1.1050 | 300097 | 303453 | conserved hypothetical protein                                                  |
| Tb927.1.1060 | 303934 | 304851 | conserved hypothetical protein                                                  |
| Tb927.1.1070 | 305147 | 305380 | hypothetical protein                                                            |
| Tb927.1.1080 | 305843 | 307300 | conserved hypothetical protein                                                  |
| Tb927.1.1090 | 307648 | 308220 | hypothetical protein                                                            |
| Tb927.1.1100 | 308704 | 311616 | conserved hypothetical protein                                                  |
| Tb927.1.1110 | 311739 | 311906 | hypothetical protein                                                            |
| Tb927.1.1120 | 312457 | 313566 | conserved hypothetical protein                                                  |
| Tb927.1.1130 | 313980 | 315833 | glycerol-3-phosphate dehydrogenase                                              |
| Tb927.1.1140 | 316190 | 317263 | conserved hypothetical protein                                                  |
| Tb927.1.1150 | 317829 | 319271 | zeta tubulin                                                                    |
| Tb927.1.1160 | 319653 | 321248 | hypothetical protein                                                            |
| Tb927.1.1170 | 321388 | 321873 | hypothetical protein                                                            |
| Tb927.1.1180 | 322693 | 323139 | hypothetical protein                                                            |
| Tb927.1.1200 | 323197 | 324486 | hypothetical protein                                                            |
| Tb927.1.1210 | 325554 | 325988 | hypothetical protein                                                            |
| Tb927.1.1220 | 326712 | 327395 | hypothetical protein                                                            |
| Tb927.1.1230 | 327663 | 329105 | chaperone protein DNAJ, putative                                                |
| Tb927.1.1240 | 330289 | 332058 | cytidine triphosphate synthase, putative                                        |
| Tb927.1.1250 | 332202 | 332513 | hypothetical protein, unlikely                                                  |
| Tb927.1.1260 | 334180 | 333686 | hypothetical protein, unlikely<br>homocysteine S-methyltransferase,<br>putative |
| Tb927.1.1270 | 334687 | 335988 |                                                                                 |
| Tb927.1.1280 | 336062 | 336493 | hypothetical protein, unlikely                                                  |
| Tb927.1.1290 | 337453 | 337776 | hypothetical protein, unlikely                                                  |
| Tb927.1.1300 | 338098 | 339021 | hypothetical protein                                                            |
| Tb927.1.1310 | 339557 | 340849 | hypothetical protein                                                            |
| Tb927.1.1320 | 340881 | 341111 | hypothetical protein                                                            |
| Tb927.1.1330 | 341299 | 342519 | conserved hypothetical protein                                                  |
| Tb927.1.1340 | 342978 | 345206 | hypothetical protein                                                            |
| Tb927.1.1350 | 345785 | 348445 | kinesin heavy chain isoform 5c, putative                                        |
| Tb927.1.1360 | 348721 | 349077 | hypothetical protein                                                            |
| Tb927.1.1370 | 350095 | 352134 | rRNA biogenesis protein, putative                                               |
| Tb927.1.1380 | 353241 | 354962 | serine/threonine protein phosphatase 2a                                         |
| Tb927.1.1390 | 356937 | 357674 | hypothetical protein                                                            |
| Tb927.1.1400 | 358355 | 358936 | hypothetical protein                                                            |
| Tb927.1.1410 | 360099 | 359665 | hypothetical protein, unlikely                                                  |
| Tb927.1.1420 | 360261 | 362252 | hypothetical protein                                                            |
| Tb927.1.1430 | 363119 | 362667 | hypothetical protein                                                            |
| Tb927.1.1440 | 363521 | 363327 | hypothetical protein                                                            |
| Tb927.1.1450 | 364428 | 364207 | hypothetical protein, unlikely                                                  |
| Tb927.1.1460 | 366324 | 366866 | hypothetical protein                                                            |
| Tb927.1.1470 | 367865 | 369622 | hypothetical protein                                                            |
| Tb927.1.1480 | 369800 | 370105 | hypothetical protein                                                            |
| Tb927.1.1490 | 374032 | 373646 | hypothetical protein, unlikely                                                  |
| Tb927.1.1500 | 374878 | 376872 | hypothetical protein                                                            |
| Tb927.1.1510 | 378501 | 378094 | hypothetical protein, unlikely                                                  |
| Tb927.1.1520 | 379597 | 379935 | hypothetical protein, unlikely                                                  |
| Tb927.1.1530 | 385710 | 390938 | protein kinase, putative                                                        |
| Tb927.1.1540 | 394806 | 396761 | hypothetical protein                                                            |
| Tb927.1.1550 | 397190 | 399262 | conserved hypothetical protein                                                  |
| Tb927.1.1560 | 399676 | 401853 | vesicular-fusion protein NsF, putative;                                         |
| Tb927.1.1570 | 403250 | 403615 | hypothetical protein                                                            |

|              |        |        |                                                |        |
|--------------|--------|--------|------------------------------------------------|--------|
| Tb927.1.1580 | 403775 | 404680 | SCO2 or SCO2 protein homolog, putative         |        |
| Tb927.1.1590 | 404939 | 405205 | hypothetical protein, unlikely                 |        |
| Tb927.1.1600 | 405678 | 410249 | hypothetical protein                           |        |
| Tb927.1.1610 | 411411 | 412223 | hypothetical protein                           |        |
| Tb927.1.1620 | 412960 | 415179 | ATP-dependent RNA helicase, putative           |        |
| Tb927.1.1630 | 415685 | 416167 | conserved hypothetical protein                 |        |
| Tb927.1.1640 | 416752 | 417804 | hypothetical protein                           |        |
| Tb927.1.1650 | 418001 | 418510 | hypothetical protein                           |        |
| Tb927.1.1660 | 418829 | 419716 | hypothetical protein                           |        |
| Tb927.1.1670 | 420035 | 423280 | hypothetical protein                           |        |
| Tb927.1.1680 | 424666 | 425379 | hypothetical protein                           |        |
| Tb927.1.1690 | 425787 | 428240 | TbMP90; RNA editing complex protein; nuclease, | TbMP90 |
| Tb927.1.1700 | 428876 | 430357 | hypothetical protein                           |        |
| Tb927.1.1710 | 430943 | 436303 | hypothetical protein                           |        |
| Tb927.1.1720 | 436874 | 438166 | hypothetical protein                           |        |
| Tb927.1.1730 | 438709 | 440790 | hypothetical protein                           |        |
| Tb927.1.1740 | 441389 | 462853 | hypothetical protein                           |        |
| Tb927.1.1750 | 463474 | 464886 | hypothetical protein                           |        |
| Tb927.1.1760 | 465361 | 465801 | hypothetical protein                           |        |
| Tb927.1.1770 | 466913 | 467236 | glutaredoxin, putative                         |        |
| Tb927.1.1780 | 467566 | 467982 | hypothetical protein                           |        |
| Tb927.1.1790 | 468196 | 468879 | hypothetical protein                           |        |
| Tb927.1.1800 | 468994 | 469428 | hypothetical protein                           |        |
| Tb927.1.1810 | 470007 | 469672 | hypothetical protein, unlikely                 |        |
| Tb927.1.1820 | 470272 | 471417 | hypothetical protein                           |        |
| Tb927.1.1830 | 471622 | 471843 | hypothetical protein, unlikely                 |        |
| Tb927.1.1840 | 474175 | 475821 | hypothetical protein                           |        |
| Tb927.1.1850 | 479794 | 481677 | hypothetical protein                           |        |
| Tb927.1.1860 | 481791 | 482222 | hypothetical protein                           |        |
| Tb927.1.1870 | 483761 | 483922 | hypothetical protein                           |        |
| Tb927.1.1880 | 484190 | 488521 | hypothetical protein                           |        |
| Tb927.1.1890 | 489019 | 492543 | hypothetical protein                           |        |
| Tb927.1.1900 | 493441 | 493743 | hypothetical protein                           |        |
| Tb927.1.1910 | 493801 | 497577 | hypothetical protein                           |        |
| Tb927.1.1920 | 498194 | 499519 | hypothetical protein                           |        |
| Tb927.1.1930 | 501553 | 510264 | phosphatidylinositol 3-kinase, putative        |        |
| Tb927.1.1940 | 511620 | 511964 | hypothetical protein, unlikely                 |        |
| Tb927.1.1950 | 511996 | 512232 | hypothetical protein                           |        |
| Tb927.1.1960 | 514039 | 516015 | DNAJ-like protein, putative                    |        |
| Tb927.1.1970 | 516161 | 516532 | hypothetical protein                           |        |
| Tb927.1.1980 | 516570 | 517472 | hypothetical protein                           |        |
| Tb927.1.1990 | 517754 | 518431 | hypothetical protein                           |        |
| Tb927.1.2000 | 518951 | 519181 | hypothetical protein                           |        |
| Tb927.1.2010 | 519284 | 519412 | hypothetical protein                           |        |
| Tb927.1.2020 | 520148 | 520453 | hypothetical protein                           |        |
| Tb927.1.2030 | 520933 | 520814 | hypothetical protein, unlikely                 |        |
| Tb927.1.2040 | 522462 | 521080 | ESAG2 (expression site-associated gene 2)      | ESAG2  |
| Tb927.1.2050 | 522889 | 522530 | hypothetical protein, unlikely                 |        |
| Tb927.1.2060 | 524873 | 524736 | hypothetical protein                           |        |
| Tb927.1.2070 | 525252 | 524998 | hypothetical protein                           |        |
| Tb927.1.2080 | 526454 | 526047 | hypothetical protein                           |        |
| Tb927.1.2090 | 530093 | 530299 | hypothetical protein, unlikely                 |        |
| Tb927.1.2100 | 531583 | 535023 | calpain-like protein, putative                 |        |

|              |        |        |                                                                           |          |
|--------------|--------|--------|---------------------------------------------------------------------------|----------|
| Tb927.1.2110 | 536277 | 538325 | calpain-like protein, putative                                            |          |
| Tb927.1.2120 | 540718 | 542916 | calpain-like protein, putative                                            |          |
| Tb927.1.2130 | 543136 | 543306 | hypothetical protein                                                      |          |
| Tb927.1.2140 | 545000 | 545302 | hypothetical protein, unlikely                                            |          |
| Tb927.1.2150 | 546235 | 546657 | calpain-like protein fragment, putative                                   |          |
| Tb927.1.2160 | 548865 | 549257 | calpain-like protein fragment, putative                                   |          |
| Tb927.1.2170 | 550412 | 550035 | hypothetical protein, unlikely                                            |          |
| Tb927.1.2180 | 552918 | 552469 | hypothetical protein, unlikely                                            |          |
| Tb927.1.2190 | 553230 | 558473 | conserved hypothetical protein                                            |          |
| Tb927.1.2200 | 559615 | 559872 | hypothetical protein                                                      |          |
| Tb927.1.2210 | 560164 | 561120 | hypothetical protein                                                      |          |
| Tb927.1.2220 | 561906 | 561478 | hypothetical protein, unlikely                                            |          |
| Tb927.1.2230 | 562244 | 562615 | calpain-like protein fragment, putative                                   |          |
| Tb927.1.2240 | 563641 | 563940 | hypothetical protein, unlikely                                            |          |
| Tb927.1.2250 | 564132 | 564425 | hypothetical protein, unlikely                                            |          |
| Tb927.1.2260 | 564977 | 565366 | calpain-like protein fragment, putative                                   |          |
| Tb927.1.2270 | 565576 | 565704 | hypothetical protein, unlikely                                            |          |
| Tb927.1.2280 | 565990 | 566436 | hypothetical protein, unlikely                                            |          |
| Tb927.1.2290 | 566778 | 567119 | hypothetical protein, unlikely                                            |          |
| Tb927.1.2300 | 567208 | 567531 | hypothetical protein, unlikely                                            |          |
| Tb927.1.2310 | 567609 | 567878 | hypothetical protein                                                      |          |
| Tb927.1.2320 | 568650 | 569507 | hypothetical protein                                                      |          |
| Tb927.1.2330 | 570482 | 571810 | beta tubulin                                                              |          |
| Tb927.1.2340 | 572442 | 573797 | alpha tubulin                                                             |          |
| Tb927.1.2350 | 574124 | 575452 | beta tubulin                                                              |          |
| Tb927.1.2360 | 576084 | 577439 | alpha tubulin                                                             |          |
| Tb927.1.2370 | 577766 | 579094 | beta tubulin                                                              |          |
| Tb927.1.2380 | 579726 | 581081 | alpha tubulin                                                             |          |
| Tb927.1.2390 | 581408 | 582736 | beta tubulin                                                              |          |
| Tb927.1.2400 | 583368 | 584723 | alpha tubulin                                                             |          |
| Tb927.1.2410 | 585050 | 585950 | beta tubulin, pseudogene                                                  |          |
| Tb927.1.2420 | 591274 | 591804 | hypothetical protein                                                      |          |
| Tb927.1.2430 | 592496 | 592897 | histone H3, putative                                                      |          |
| Tb927.1.2440 | 593321 | 593605 | hypothetical protein                                                      |          |
| Tb927.1.2450 | 594079 | 594480 | histone H3, putative                                                      |          |
| Tb927.1.2460 | 594904 | 595188 | hypothetical protein                                                      |          |
| Tb927.1.2470 | 595663 | 596064 | histone H3, putative                                                      |          |
| Tb927.1.2480 | 596496 | 596780 | hypothetical protein                                                      |          |
| Tb927.1.2490 | 597255 | 597656 | histone H3, putative                                                      |          |
| Tb927.1.2500 | 598085 | 598366 | hypothetical protein                                                      |          |
| Tb927.1.2510 | 598841 | 599242 | histone H3, putative                                                      |          |
| Tb927.1.2520 | 599671 | 599952 | hypothetical protein                                                      |          |
| Tb927.1.2530 | 600427 | 600828 | histone H3, putative                                                      |          |
| Tb927.1.2540 | 601252 | 601536 | hypothetical protein                                                      |          |
| Tb927.1.2550 | 602011 | 602412 | histone H3, putative                                                      |          |
| Tb927.1.2560 | 602836 | 603120 | hypothetical protein                                                      |          |
| Tb927.1.2570 | 603482 | 606430 | coatamer beta subunit<br>RNasePH-like protein; exosome associated         | beta-coP |
| Tb927.1.2580 | 607402 | 608595 | protein                                                                   | TbEAP1   |
| Tb927.1.2590 | 609673 | 609245 | hypothetical protein, unlikely<br>RNA-binding regulatory protein (pumilio |          |
| Tb927.1.2600 | 610030 | 612033 | family),                                                                  |          |
| Tb927.1.2610 | 614209 | 614334 | hypothetical protein, unlikely                                            |          |
| Tb927.1.2620 | 614937 | 614629 | hypothetical protein, unlikely                                            |          |
| Tb927.1.2630 | 615632 | 615297 | hypothetical protein, unlikely                                            |          |

|              |        |        |                                                                            |        |
|--------------|--------|--------|----------------------------------------------------------------------------|--------|
| Tb927.1.2640 | 616596 | 617552 | hypothetical protein                                                       |        |
| Tb927.1.2650 | 617733 | 617984 | hypothetical protein                                                       |        |
| Tb927.1.2660 | 618162 | 618335 | hypothetical protein, unlikely axoneme central apparatus protein, putative |        |
| Tb927.1.2670 | 618929 | 620470 | hypothetical protein                                                       |        |
| Tb927.1.2680 | 621017 | 621307 | hypothetical protein                                                       |        |
| Tb927.1.2690 | 621728 | 622138 | hypothetical protein                                                       |        |
| Tb927.1.2700 | 622544 | 623776 | hypothetical protein                                                       |        |
| Tb927.1.2710 | 624700 | 626841 | hypothetical protein                                                       |        |
| Tb927.1.2720 | 626895 | 627206 | hypothetical protein, unlikely                                             |        |
| Tb927.1.2730 | 628874 | 629938 | hypothetical protein                                                       |        |
| Tb927.1.2740 | 631269 | 632888 | hypothetical protein                                                       |        |
| Tb927.1.2750 | 633365 | 633871 | hypothetical protein                                                       |        |
| Tb927.1.2760 | 634113 | 634226 | hypothetical protein                                                       |        |
| Tb927.1.2770 | 634816 | 636027 | hypothetical protein                                                       |        |
| Tb927.1.2780 | 637506 | 637282 | hypothetical protein                                                       |        |
| Tb927.1.2790 | 638388 | 637714 | hypothetical protein                                                       |        |
| Tb927.1.2800 | 639211 | 639014 | hypothetical protein, unlikely                                             |        |
| Tb927.1.2810 | 639869 | 640147 | hypothetical protein, unlikely                                             |        |
| Tb927.1.2820 | 643237 | 641279 | pteridine transporter, putative                                            |        |
| Tb927.1.2830 | 643319 | 643576 | hypothetical protein, unlikely                                             |        |
| Tb927.1.2840 | 643864 | 644142 | hypothetical protein, unlikely                                             |        |
| Tb927.1.2850 | 647235 | 645277 | pteridine transporter, putative                                            |        |
| Tb927.1.2860 | 647317 | 647574 | hypothetical protein, unlikely                                             |        |
| Tb927.1.2870 | 647862 | 648140 | hypothetical protein, unlikely                                             |        |
| Tb927.1.2880 | 651238 | 649280 | pteridine transporter, putative                                            |        |
| Tb927.1.2890 | 651320 | 651577 | hypothetical protein, unlikely                                             |        |
| Tb927.1.2900 | 652247 | 652600 | hypothetical protein, unlikely                                             |        |
| Tb927.1.2910 | 652719 | 652937 | hypothetical protein, unlikely                                             |        |
| Tb927.1.2920 | 653941 | 654249 | hypothetical protein                                                       |        |
| Tb927.1.2930 | 654595 | 655062 | hypothetical protein                                                       |        |
| Tb927.1.2940 | 655066 | 655449 | hypothetical protein                                                       |        |
| Tb927.1.2950 | 655620 | 655889 | hypothetical protein                                                       |        |
| Tb927.1.2960 | 656007 | 656174 | hypothetical protein, unlikely                                             |        |
| Tb927.1.2970 | 656593 | 657333 | hypothetical protein                                                       |        |
| Tb927.1.2980 | 658815 | 662354 | hypothetical protein                                                       |        |
| Tb927.1.2990 | 663658 | 666732 | hypothetical protein                                                       |        |
| Tb927.1.3000 | 667007 | 668215 | N-acyl-L-amino acid amidohydrolase, putative                               |        |
| Tb927.1.3010 | 668792 | 669910 | conserved hypothetical protein                                             |        |
| Tb927.1.3020 | 670006 | 670218 | hypothetical protein, unlikely                                             |        |
| Tb927.1.3030 | 670282 | 671532 | TbREL2; RNA editing ligase; RNA editing complex                            | TbREL2 |
| Tb927.1.3040 | 671848 | 672660 | hypothetical protein                                                       |        |
| Tb927.1.3050 | 673048 | 674727 | hypothetical protein                                                       |        |
| Tb927.1.3060 | 675081 | 675194 | hypothetical protein, unlikely                                             |        |
| Tb927.1.3070 | 675213 | 676454 | hypothetical protein                                                       |        |
| Tb927.1.3080 | 676583 | 676891 | hypothetical protein, unlikely                                             |        |
| Tb927.1.3090 | 677018 | 677170 | hypothetical protein, unlikely                                             |        |
| Tb927.1.3100 | 677216 | 677485 | hypothetical protein, unlikely                                             |        |
| Tb927.1.3110 | 677766 | 678611 | soluble N-ethylmaleimide sensitive factor (NSF)                            |        |
| Tb927.1.3120 | 679153 | 682632 | separin (C50 family cysteine protease),                                    |        |
| Tb927.1.3130 | 683132 | 684631 | protein kinase, putative                                                   |        |
| Tb927.1.3140 | 684930 | 685094 | hypothetical protein                                                       |        |

|              |        |        |                                            |
|--------------|--------|--------|--------------------------------------------|
| Tb927.1.3150 | 685542 | 686459 | hypothetical protein                       |
| Tb927.1.3160 | 687105 | 687290 | hypothetical protein                       |
| Tb927.1.3170 | 687336 | 688253 | conserved hypothetical protein             |
| Tb927.1.3180 | 688963 | 689487 | 40S ribosomal protein S11, putative        |
| Tb927.1.3190 | 689689 | 689991 | hypothetical protein, unlikely             |
| Tb927.1.3200 | 690155 | 690820 | phosphatase-like protein, putative         |
| Tb927.1.3210 | 691036 | 691386 | hypothetical protein                       |
| Tb927.1.3220 | 691797 | 693398 | conserved hypothetical protein             |
| Tb927.1.3230 | 694318 | 696465 | cell division cycle protein, putative      |
| Tb927.1.3240 | 696621 | 696731 | hypothetical protein                       |
| Tb927.1.3250 | 697025 | 702331 | hypothetical protein                       |
| Tb927.1.3260 | 703126 | 708786 | hypothetical protein                       |
| Tb927.1.3270 | 709573 | 712308 | hypothetical protein                       |
| Tb927.1.3280 | 712878 | 713735 | conserved hypothetical protein             |
| Tb927.1.3290 | 714237 | 717203 | hypothetical protein                       |
| Tb927.1.3300 | 717984 | 720602 | zinc-binding phosphatase, putative         |
| Tb927.1.3310 | 722222 | 722980 | hypothetical protein                       |
| Tb927.1.3320 | 724456 | 725505 | hypothetical leucine rich repeat protein 3 |
| Tb927.1.3330 | 725837 | 726058 | hypothetical protein                       |
| Tb927.1.3340 | 726707 | 726895 | hypothetical protein                       |
| Tb927.1.3350 | 727719 | 728189 | hypothetical protein                       |
| Tb927.1.3360 | 728726 | 728538 | hypothetical protein                       |
| Tb927.1.3370 | 729884 | 729441 | hypothetical protein                       |
| Tb927.1.3380 | 730441 | 730833 | hypothetical protein, unlikely             |
| Tb927.1.3390 | 732211 | 731723 | conserved hypothetical protein             |
| Tb927.1.3400 | 733820 | 732771 | conserved hypothetical protein             |
| Tb927.1.3410 | 735953 | 734457 | conserved hypothetical protein             |
| Tb927.1.3420 | 736789 | 736607 | hypothetical protein, unlikely             |
| Tb927.1.3430 | 737368 | 737240 | hypothetical protein, unlikely             |
| Tb927.1.3440 | 737678 | 737433 | hypothetical protein, unlikely             |
| Tb927.1.3450 | 740132 | 737757 | conserved hypothetical protein             |
| Tb927.1.3460 | 740595 | 740185 | hypothetical protein, unlikely             |
| Tb927.1.3470 | 751679 | 751482 | hypothetical protein                       |
| Tb927.1.3480 | 752156 | 751806 | hypothetical protein, unlikely             |
| Tb927.1.3490 | 753867 | 754265 | hypothetical protein, unlikely             |
| Tb927.1.3500 | 754577 | 754687 | hypothetical protein, unlikely             |
| Tb927.1.3510 | 754952 | 755146 | hypothetical protein, unlikely             |
| Tb927.1.3520 | 755215 | 755586 | hypothetical protein, unlikely             |
| Tb927.1.3530 | 755593 | 755892 | hypothetical protein, unlikely             |
| Tb927.1.3540 | 756471 | 756133 | hypothetical protein                       |
| Tb927.1.3550 | 757868 | 756777 | hypothetical protein                       |
| Tb927.1.3560 | 761284 | 758687 | hypothetical protein                       |
| Tb927.1.3570 | 763568 | 763894 | hypothetical protein, unlikely             |
| Tb927.1.3580 | 764542 | 764150 | hypothetical protein                       |
| Tb927.1.3590 | 765398 | 765114 | hypothetical protein, unlikely             |
| Tb927.1.3600 | 766087 | 765947 | hypothetical protein, unlikely             |
| Tb927.1.3610 | 766747 | 766154 | hypothetical protein                       |
| Tb927.1.3620 | 766853 | 767080 | hypothetical protein, unlikely             |
| Tb927.1.3630 | 767968 | 767747 | hypothetical protein                       |
| Tb927.1.3640 | 768476 | 768652 | hypothetical protein, unlikely             |
| Tb927.1.3650 | 769720 | 769457 | hypothetical protein                       |
| Tb927.1.3660 | 771106 | 776346 | ingi (orf1), pseudogene                    |
| Tb927.1.3670 | 776625 | 778766 | hypothetical leucine-rich repeat protein 2 |
| Tb927.1.3680 | 779505 | 779245 | hypothetical protein, unlikely             |

|              |        |        |                                                                                      |        |
|--------------|--------|--------|--------------------------------------------------------------------------------------|--------|
| Tb927.1.3690 | 785893 | 790650 | ingi (orf1), pseudogene                                                              |        |
| Tb927.1.3700 | 791451 | 791780 | hypothetical protein, unlikely                                                       |        |
| Tb927.1.3710 | 792345 | 791965 | hypothetical protein, unlikely                                                       |        |
| Tb927.1.3720 | 792779 | 792399 | hypothetical protein, unlikely                                                       |        |
| Tb927.1.3730 | 793345 | 793172 | rRNA M2/180 small ribosomal RNA                                                      |        |
| Tb927.1.3740 | 801841 | 802191 | rRNA M4/140 small ribosomal RNA                                                      |        |
| Tb927.1.3750 | 804064 | 803648 | hypothetical protein                                                                 |        |
| Tb927.1.3760 | 806224 | 805538 | hypothetical protein                                                                 |        |
| Tb927.1.3770 | 812771 | 812908 | hypothetical protein                                                                 |        |
| Tb927.1.3780 | 812921 | 813322 | hypothetical protein                                                                 |        |
| Tb927.1.3790 | 813502 | 813963 | hypothetical protein                                                                 |        |
| Tb927.1.3800 | 814305 | 814850 | hypothetical protein                                                                 |        |
| Tb927.1.3810 | 815033 | 815491 | hypothetical protein                                                                 |        |
| Tb927.1.3820 | 815748 | 816149 | ATP synthase subunit, putative<br>glucose-6-phosphate isomerase,<br>glycosomal       | PGI    |
| Tb927.1.3830 | 816419 | 818242 | hypothetical protein                                                                 |        |
| Tb927.1.3840 | 818596 | 820566 | hypothetical protein, unlikely                                                       |        |
| Tb927.1.3850 | 821129 | 821290 | conserved hypothetical protein                                                       |        |
| Tb927.1.3860 | 822570 | 826118 | hypothetical protein, unlikely                                                       |        |
| Tb927.1.3870 | 826237 | 826380 | conserved hypothetical protein                                                       |        |
| Tb927.1.3880 | 827008 | 832221 | hypothetical protein                                                                 |        |
| Tb927.1.3890 | 832456 | 832941 | hypothetical protein, unlikely                                                       |        |
| Tb927.1.3900 | 833504 | 833656 | hypothetical protein                                                                 |        |
| Tb927.1.3910 | 833797 | 836520 | hypothetical protein, unlikely                                                       |        |
| Tb927.1.3920 | 836710 | 836967 | hypothetical protein, unlikely                                                       |        |
| Tb927.1.3930 | 837049 | 837288 | conserved hypothetical protein                                                       |        |
| Tb927.1.3940 | 837683 | 840421 | alanine aminotransferase, putative                                                   |        |
| Tb927.1.3950 | 840682 | 842391 | hypothetical protein, unlikely                                                       |        |
| Tb927.1.3960 | 842569 | 842733 | hypothetical protein, unlikely                                                       |        |
| Tb927.1.3970 | 842920 | 843066 | hypothetical protein, unlikely                                                       |        |
| Tb927.1.3980 | 843225 | 843425 | hypothetical protein, unlikely                                                       |        |
| Tb927.1.3990 | 843606 | 843812 | hypothetical protein, unlikely                                                       |        |
| Tb927.1.4000 | 843964 | 844257 | hypothetical protein, unlikely                                                       |        |
| Tb927.1.4010 | 844858 | 848607 | conserved hypothetical protein                                                       |        |
| Tb927.1.4020 | 848943 | 849479 | hypothetical protein                                                                 |        |
| Tb927.1.4030 | 851425 | 851757 | hypothetical protein, unlikely                                                       |        |
| Tb927.1.4040 | 852809 | 854428 | conserved hypothetical protein                                                       |        |
| Tb927.1.4050 | 856511 | 859288 | Ser/Thr protein phosphatase, putative                                                |        |
| Tb927.1.4060 | 859290 | 859595 | hypothetical protein, unlikely                                                       |        |
| Tb927.1.4070 | 859777 | 859995 | hypothetical protein, unlikely                                                       |        |
| Tb927.1.4080 | 860310 | 860480 | hypothetical protein, unlikely                                                       |        |
| Tb927.1.4090 | 861503 | 861703 | hypothetical protein, unlikely<br>cytochrome C oxidase subunit IV<br>(PMID:12467979) | trCOIV |
| Tb927.1.4100 | 861807 | 862868 | hypothetical protein, unlikely                                                       |        |
| Tb927.1.4110 | 863428 | 862925 | hypothetical protein, unlikely                                                       |        |
| Tb927.1.4120 | 863902 | 863997 | hypothetical protein                                                                 |        |
| Tb927.1.4130 | 864453 | 864815 | conserved hypothetical protein                                                       |        |
| Tb927.1.4140 | 864961 | 866070 | hypothetical protein                                                                 |        |
| Tb927.1.4150 | 866280 | 866606 | conserved hypothetical protein                                                       |        |
| Tb927.1.4160 | 866968 | 867468 | hypothetical protein, unlikely                                                       |        |
| Tb927.1.4170 | 867629 | 867811 | conserved hypothetical protein                                                       |        |
| Tb927.1.4180 | 868118 | 870352 | hypothetical protein, unlikely                                                       |        |
| Tb927.1.4190 | 870361 | 870468 | hypothetical protein, unlikely                                                       |        |
| Tb927.1.4200 | 870824 | 870985 | hypothetical protein                                                                 |        |
| Tb927.1.4210 | 871490 | 871669 | hypothetical protein                                                                 |        |

|              |        |        |                                        |
|--------------|--------|--------|----------------------------------------|
| Tb927.1.4220 | 871778 | 873064 | conserved hypothetical protein         |
| Tb927.1.4230 | 873932 | 875212 | conserved hypothetical protein         |
| Tb927.1.4240 | 876016 | 875708 | hypothetical protein, unlikely         |
| Tb927.1.4250 | 876435 | 878804 | conserved hypothetical protein         |
| Tb927.1.4260 | 879128 | 879235 | hypothetical protein, unlikely         |
| Tb927.1.4270 | 880510 | 880157 | hypothetical protein, unlikely         |
| Tb927.1.4280 | 881086 | 883182 | hypothetical protein                   |
| Tb927.1.4290 | 885763 | 886068 | hypothetical protein                   |
| Tb927.1.4300 | 886299 | 887774 | conserved hypothetical protein         |
| Tb927.1.4310 | 890927 | 895843 | conserved hypothetical protein         |
| Tb927.1.4320 | 896858 | 897055 | hypothetical protein, unlikely         |
| Tb927.1.4330 | 897678 | 897842 | hypothetical protein, unlikely         |
| Tb927.1.4340 | 899638 | 901788 | conserved hypothetical protein         |
| Tb927.1.4350 | 901901 | 902287 | hypothetical protein, unlikely         |
| Tb927.1.4360 | 902621 | 902758 | hypothetical protein, unlikely         |
| Tb927.1.4370 | 903224 | 905026 | hypothetical protein                   |
| Tb927.1.4380 | 906010 | 907602 | conserved hypothetical protein         |
| Tb927.1.4390 | 907733 | 907876 | hypothetical protein, unlikely         |
| Tb927.1.4400 | 908100 | 908966 | hypothetical protein                   |
| Tb927.1.4410 | 909535 | 911871 | hypothetical protein                   |
| Tb927.1.4420 | 912324 | 915161 | ABC transporter, putative              |
| Tb927.1.4430 | 915270 | 915539 | hypothetical protein                   |
| Tb927.1.4440 | 915863 | 916498 | hypothetical protein, unlikely         |
| Tb927.1.4450 | 916553 | 920056 | conserved hypothetical protein         |
| Tb927.1.4460 | 920894 | 921106 | hypothetical protein                   |
| Tb927.1.4470 | 921423 | 922754 | hypothetical protein                   |
| Tb927.1.4480 | 923539 | 927993 | conserved hypothetical protein         |
| Tb927.1.4490 | 928858 | 929376 | acetyltransferase, putative            |
| Tb927.1.4500 | 932707 | 933594 | conserved hypothetical protein         |
| Tb927.1.4510 | 933794 | 934099 | hypothetical protein                   |
| Tb927.1.4520 | 934943 | 937138 | hypothetical protein                   |
| Tb927.1.4530 | 937516 | 937638 | hypothetical protein, unlikely         |
| Tb927.1.4540 | 939394 | 940977 | hypothetical protein                   |
| Tb927.1.4550 | 941652 | 942035 | hypothetical protein, unlikely         |
| Tb927.1.4560 | 942522 | 944105 | hypothetical protein                   |
| Tb927.1.4570 | 944779 | 945114 | hypothetical protein, unlikely         |
| Tb927.1.4580 | 945585 | 947168 | hypothetical protein                   |
| Tb927.1.4590 | 947842 | 948225 | hypothetical protein, unlikely         |
| Tb927.1.4600 | 948712 | 950295 | hypothetical protein                   |
| Tb927.1.4610 | 950339 | 950470 | hypothetical protein, unlikely         |
| Tb927.1.4620 | 950969 | 951370 | hypothetical protein, unlikely         |
| Tb927.1.4630 | 951841 | 953424 | hypothetical protein                   |
| Tb927.1.4640 | 953468 | 953599 | hypothetical protein, unlikely         |
| Tb927.1.4650 | 954904 | 956334 | hypothetical protein                   |
| Tb927.1.4660 | 957079 | 956636 | hypothetical protein, unlikely         |
| Tb927.1.4670 | 957612 | 957223 | hypothetical protein, unlikely         |
| Tb927.1.4680 | 962750 | 963745 | hypothetical protein                   |
| Tb927.1.4690 | 964186 | 965223 | arginine N-methyltransferase, putative |
| Tb927.1.4700 | 966037 | 966996 | hypothetical protein                   |
| Tb927.1.4710 | 967788 | 968324 | hypothetical protein                   |
| Tb927.1.4720 | 968784 | 970679 | conserved hypothetical protein         |
| Tb927.1.4730 | 971016 | 971492 | hypothetical protein                   |
| Tb927.1.4740 | 971957 | 975136 | conserved hypothetical protein         |
| Tb927.1.4750 | 975344 | 975565 | hypothetical protein, unlikely         |

|              |         |         |                                              |        |
|--------------|---------|---------|----------------------------------------------|--------|
| Tb927.1.4760 | 975844  | 978930  | conserved hypothetical protein               |        |
| Tb927.1.4770 | 979335  | 979487  | hypothetical protein, unlikely               |        |
| Tb927.1.4780 | 979543  | 981555  | conserved hypothetical protein               |        |
| Tb927.1.4790 | 981970  | 982341  | hypothetical protein                         |        |
| Tb927.1.4800 | 982545  | 983948  | hypothetical protein                         |        |
| Tb927.1.4810 | 984460  | 985912  | hypothetical protein                         |        |
| Tb927.1.4820 | 986076  | 986387  | hypothetical protein                         |        |
| Tb927.1.4830 | 986718  | 987620  | phospholipase A1, putative                   |        |
| Tb927.1.4840 | 988168  | 987821  | hypothetical protein, unlikely               |        |
| Tb927.1.4850 | 988919  | 989137  | hypothetical protein                         |        |
| Tb927.1.4860 | 989446  | 989637  | ESAG11, pseudogene                           |        |
| Tb927.1.4870 | 989771  | 990757  | ESAG1 (expression site-associated gene 1)    | ESAG1  |
| Tb927.1.4880 | 991536  | 991697  | hypothetical protein                         |        |
| Tb927.1.4890 | 992004  | 993368  | ESAG2 (expression site-associated gene 2)    | ESAG2  |
| Tb927.1.4900 | 993544  | 994662  | ESAG11 (expression site-associated gene 11)  | ESAG11 |
| Tb927.1.4910 | 994793  | 995767  | ESAG1 (expression site-associated gene 1)    | ESAG1  |
| Tb927.1.4920 | 996672  | 997259  | hypothetical protein                         |        |
| Tb927.1.4930 | 998235  | 997882  | hypothetical protein, unlikely               |        |
| Tb927.1.4940 | 998941  | 999138  | hypothetical protein                         |        |
| Tb927.1.4950 | 999600  | 999851  | hypothetical protein                         |        |
| Tb927.1.4960 | 1001301 | 1001525 | hypothetical protein                         |        |
| Tb927.1.4970 | 1001582 | 1002058 | hypothetical protein                         |        |
| Tb927.1.4980 | 1002297 | 1002404 | hypothetical protein                         |        |
| Tb927.1.4990 | 1002757 | 1002900 | hypothetical protein                         |        |
| Tb927.1.5000 | 1004308 | 1005123 | hypothetical protein                         |        |
| Tb927.1.5010 | 1006378 | 1006575 | hypothetical protein                         |        |
| Tb927.1.5020 | 1007260 | 1007418 | hypothetical protein, unlikely               |        |
| Tb927.1.5030 | 1007804 | 1010011 | hypothetical leucine-rich repeat protein 4   |        |
| Tb927.1.5040 | 1010282 | 1010515 | hypothetical protein                         |        |
| Tb927.1.5050 | 1012162 | 1012371 | hypothetical protein                         |        |
| Tb927.1.5060 | 1013265 | 1014302 | variant surface glycoprotein, truncated      |        |
| Tb927.1.5070 | 1014345 | 1014479 | hypothetical protein, unlikely               |        |
| Tb927.1.5080 | 1015395 | 1016174 | ESAG9 (expression site-associated gene 9)    |        |
| Tb927.1.5090 | 1016683 | 1016862 | ESAG1, pseudogene                            |        |
| Tb927.1.5100 | 1018092 | 1019468 | ESAG2 (expression site-associated gene 2)    | ESAG2  |
| Tb927.1.5110 | 1019645 | 1020739 | ESAG11 (expression site-associated gene 11)  | ESAG11 |
| Tb927.1.5120 | 1020872 | 1021855 | ESAG1 (expression site-associated gene 1)    | ESAG1  |
| Tb927.1.5130 | 1021859 | 1022026 | hypothetical protein, unlikely               |        |
| Tb927.1.5140 | 1025107 | 1024733 | hypothetical protein, unlikely               |        |
| Tb927.1.5150 | 1025766 | 1025861 | hypothetical protein                         |        |
| Tb927.1.5160 | 1026017 | 1026301 | hypothetical protein                         |        |
| Tb927.1.5170 | 1027246 | 1028607 | variant surface glycoprotein (VSG), putative |        |
| Tb927.1.5180 | 1028738 | 1028881 | hypothetical protein                         |        |
| Tb927.1.5190 | 1031293 | 1030952 | hypothetical protein, unlikely               |        |
| Tb927.1.5200 | 1032145 | 1033116 | ESAG1 (expression site-associated gene 1)    | ESAG1  |
| Tb927.1.5210 | 1034353 | 1034021 | hypothetical protein, unlikely               |        |

|              |         |         |                                              |       |
|--------------|---------|---------|----------------------------------------------|-------|
| Tb927.1.5220 | 1035260 | 1036153 | ESAG9 (expression site-associated gene 9)    | ESAG9 |
| Tb927.1.5230 | 1036550 | 1036245 | hypothetical protein, unlikely               |       |
| Tb927.1.5240 | 1039808 | 1040794 | ESAG1 (expression site-associated gene 1)    | ESAG1 |
| Tb927.1.5250 | 1041436 | 1041260 | hypothetical protein                         |       |
| Tb927.1.5260 | 1041565 | 1042104 | hypothetical protein                         |       |
| Tb927.1.5270 | 1047761 | 1047531 | hypothetical protein, unlikely               |       |
| Tb927.1.5280 | 1049053 | 1047901 | ESAG3, pseudogene                            |       |
| Tb927.1.5290 | 1049677 | 1049405 | hypothetical protein, unlikely               |       |
| Tb927.1.5300 | 1051560 | 1050169 | variant surface glycoprotein (VSG), putative |       |
| Tb927.1.5310 | 1053081 | 1053425 | hypothetical protein, unlikely               |       |
| Tb927.1.5320 | 1055174 | 1053801 | VSG, pseudogene                              |       |
| Tb927.1.5330 | 1057855 | 1056242 | variant surface glycoprotein (VSG), putative |       |

Note: pseudogenes are shown in grey
